# Supplementary material
Source: Research Square preprint supplement (doi:10.21203/rs.3.rs-10203181/v1)
Supplement: Supplementary file 1 [file 0993aa5837523d8bf3342edf.docx]

**Supplementary Materials**

Article Title: Integrated Epidemiologic and Genomic Surveillance of Carbapenemase-Producing Enterobacterales in a Regional Healthcare Network

Authors: Yujin Sohn, Imchang Lee, Won Sup Oh, Seungmin Jeong, Dong-Hyun Kim, Eun Hee Song, Young Keun Kim, Seung Soon Lee

Corresponding Author:

Seung Soon Lee (hushh93@hallym.ac.kr)

Young Keun Kim (amoxj@yonsei.ac.kr)

Eun Hee Song (songeh@gnah.co.kr)

Table of Contents

Table S1. Genome metadata and BioSample accessions for 242 CPE isolates included in genomic analyses.

Supplementary Figure legends.

Figure S1. Classification scheme for antimicrobial resistance determinants.

Figure S2. Concordance between clinical species identification and genome-based species assignment.

Figure S3. Monthly distribution of genome-based species assignments by healthcare facility.

Figure S4. Species-level antimicrobial resistance profiles of *Klebsiella* spp. and *E. coli* isolates.

The table S1 is provided as SupplementaryTable1.xlsx.

Supplementary Figure legends

**Figure S1. Classification scheme for antimicrobial resistance determinants.** The diagram shows the grouping of detected antimicrobial resistance determinants into broad antimicrobial resistance categories used for downstream genomic visualization and summary analyses. Left-side labels indicate antimicrobial resistance categories, and right-side labels indicate representative genes or resistance-associated mutations assigned to each category. Grey links connect each category to the corresponding determinants.

**Figure S2. Monthly distribution of genome-based species assignments by healthcare facility.** a. Monthly species composition of analyzed genomes across all included healthcare facilities. b. Distribution of analyzed genomes by hospital and month across the full surveillance network. c. Monthly species composition restricted to ACHs. d. Hospital-level monthly distribution restricted to ACHs. Bar heights indicate genome counts. CCH, Hallym University Chuncheon Sacred Heart Hospital; CCN, Chuncheon Recuperation Hospital, CCT, Chuncheon Thomas Convalescent Hospital; GNA, Gangneung Asan Hospital; WJC, Wonju Severance Christian Hospital.

**Figure S3. Concordance between clinical species identification and genome-based species assignment.** a. Summary of concordant and discordant species assignments. b. Genome-based species distribution among discordant isolates, stratified by clinical species identification. c. Species assignment matrix comparing clinical and genome-based classifications for all paired isolates. d. Species assignment matrix restricted to mismatched isolate pairs. Numbers indicate isolate counts.

**Figure S4. Species-level antimicrobial resistance profiles of *Klebsiella* spp. and *E. coli* isolates.** Heatmap showing the prevalence of antimicrobial resistance categories among genome-confirmed *Klebsiella* spp. and *E. coli* isolates. Each cell represents the percentage of isolates within a species carrying at least one determinant in the corresponding category. TMP/Sul, trimethoprim/sulfonamide; ESBL, extended-spectrum beta-lactamase.
