# Supplementary material
Source: Research Square preprint supplement (doi:10.21203/rs.3.rs-10203181/v1)
Supplement: Supplementary file 2 [file cc1a1f0aa8302b2cb2f5ec5d.xlsx]

## Sheet: Sheet1
Table S1. Genome metadata and BioSample accessions for 242 CPE isolates included in genomic analyses
Sample_Id	Region	Hospital	Facility_Type	Organism	Carbapenemase_Family	BioSample_Accession	BioProject_Accession
CPE10098	Chuncheon	CCH	ACH	Citrobacter koseri	KPC	SAMN59747696	PRJNA1465574
CPE10099	Chuncheon	CCH	ACH	Klebsiella michiganensis	KPC	SAMN59747697	PRJNA1465574
CPE10103	Chuncheon	CCH	ACH	Klebsiella pneumoniae	KPC	SAMN59747698	PRJNA1465574
CPE10102	Chuncheon	CCH	ACH	Klebsiella pneumoniae	KPC	SAMN59747699	PRJNA1465574
CPE10101	Chuncheon	CCH	ACH	Klebsiella pneumoniae	KPC	SAMN59747700	PRJNA1465574
CPE10100	Chuncheon	CCH	ACH	Klebsiella michiganensis	KPC	SAMN59747701	PRJNA1465574
CPE10105	Chuncheon	CCH	ACH	Klebsiella pneumoniae	KPC	SAMN59747702	PRJNA1465574
CPE10104	Chuncheon	CCH	ACH	Klebsiella pneumoniae	KPC	SAMN59747703	PRJNA1465574
CPE10106	Chuncheon	CCH	ACH	Klebsiella pneumoniae	OXA-48 variant	SAMN59747704	PRJNA1465574
CPE10002	Wonju	WJC	ACH	Escherichia coli	KPC	SAMN59747705	PRJNA1465574
CPE10003	Wonju	WJC	ACH	Klebsiella pneumoniae	KPC	SAMN59747706	PRJNA1465574
CPE10004	Wonju	WJC	ACH	Escherichia coli	KPC, NDM	SAMN59747707	PRJNA1465574
CPE10001	Wonju	WJC	ACH	Klebsiella pneumoniae	NDM	SAMN59747708	PRJNA1465574
CPE10011	Wonju	WJC	ACH	Escherichia coli	KPC	SAMN59747709	PRJNA1465574
CPE10012	Wonju	WJC	ACH	Escherichia coli	KPC	SAMN59747710	PRJNA1465574
CPE10014	Wonju	WJC	ACH	Citrobacter koseri	OXA-48 variant	SAMN59747711	PRJNA1465574
CPE10013	Wonju	WJC	ACH	Klebsiella pneumoniae	KPC	SAMN59747712	PRJNA1465574
CPE10107	Chuncheon	CCH	ACH	Klebsiella pneumoniae	KPC	SAMN59747713	PRJNA1465574
CPE10005	Wonju	WJC	ACH	Escherichia coli	NDM	SAMN59747714	PRJNA1465574
CPE10008	Wonju	WJC	ACH	Escherichia coli	KPC	SAMN59747715	PRJNA1465574
CPE10009	Wonju	WJC	ACH	Klebsiella pneumoniae	KPC	SAMN59747716	PRJNA1465574
CPE10006	Wonju	WJC	ACH	Citrobacter koseri	OXA-48 variant	SAMN59747717	PRJNA1465574
CPE10007	Wonju	WJC	ACH	Klebsiella pneumoniae	KPC	SAMN59747718	PRJNA1465574
CPE10010	Wonju	WJC	ACH	Klebsiella pneumoniae	KPC	SAMN59747719	PRJNA1465574
CPE10108	Chuncheon	CCH	ACH	Enterobacter sp. CPE10108	IMP	SAMN59747720	PRJNA1465574
CPE10015	Wonju	WJC	ACH	Klebsiella variicola	NDM	SAMN59747721	PRJNA1465574
CPE10017	Wonju	WJC	ACH	Escherichia coli	KPC	SAMN59747722	PRJNA1465574
CPE10018	Wonju	WJC	ACH	Enterobacter ludwigii	KPC	SAMN59747723	PRJNA1465574
CPE10109	Chuncheon	CCH	ACH	Klebsiella pneumoniae	KPC	SAMN59747724	PRJNA1465574
CPE10110	Chuncheon	CCH	ACH	Klebsiella michiganensis	KPC, NDM	SAMN59747725	PRJNA1465574
CPE10179	Gangneung	GNA	ACH	Klebsiella pneumoniae	OXA-48 variant	SAMN59747726	PRJNA1465574
CPE10019	Wonju	WJC	ACH	Klebsiella aerogenes	NDM	SAMN59747727	PRJNA1465574
CPE10020	Wonju	WJC	ACH	Klebsiella pneumoniae	KPC	SAMN59747728	PRJNA1465574
CPE10180	Gangneung	GNA	ACH	Klebsiella pneumoniae	KPC	SAMN59747729	PRJNA1465574
CPE10181	Gangneung	GNA	ACH	Enterobacter hormaechei	NDM	SAMN59747730	PRJNA1465574
CPE10112	Chuncheon	CCH	ACH	Klebsiella pneumoniae	KPC	SAMN59747731	PRJNA1465574
CPE10016	Wonju	WJC	ACH	Escherichia coli	KPC	SAMN59747732	PRJNA1465574
CPE10111	Chuncheon	CCH	ACH	Klebsiella pneumoniae	KPC	SAMN59747733	PRJNA1465574
CPE10113	Chuncheon	CCH	ACH	Klebsiella pneumoniae	KPC	SAMN59747734	PRJNA1465574
CPE10182	Gangneung	GNA	ACH	Klebsiella pneumoniae	KPC	SAMN59747735	PRJNA1465574
CPE10183	Gangneung	GNA	ACH	Escherichia coli	KPC	SAMN59747736	PRJNA1465574
CPE10241	Gangneung	GNA	ACH	Klebsiella pneumoniae	KPC	SAMN59747737	PRJNA1465574
CPE10114	Chuncheon	CCH	ACH	Escherichia coli	OXA-48 variant	SAMN59747738	PRJNA1465574
CPE10116	Chuncheon	CCH	ACH	Enterobacter sp. CPE10116	IMP	SAMN59747739	PRJNA1465574
CPE10242	Gangneung	GNA	ACH	Klebsiella pneumoniae	KPC	SAMN59747740	PRJNA1465574
CPE10243	Gangneung	GNA	ACH	Klebsiella pneumoniae	KPC	SAMN59747741	PRJNA1465574
CPE10244	Gangneung	GNA	ACH	Klebsiella pneumoniae	KPC	SAMN59747742	PRJNA1465574
CPE10115	Chuncheon	CCH	ACH	Klebsiella pneumoniae	KPC	SAMN59747749	PRJNA1465574
CPE10117	Chuncheon	CCH	ACH	Klebsiella pneumoniae	KPC	SAMN59747750	PRJNA1465574
CPE10119	Chuncheon	CCH	ACH	Klebsiella pneumoniae	NDM	SAMN59747751	PRJNA1465574
CPE10120	Chuncheon	CCH	ACH	Klebsiella pneumoniae	KPC	SAMN59747752	PRJNA1465574
CPE10118	Chuncheon	CCH	ACH	Klebsiella pneumoniae	OXA-48 variant	SAMN59747753	PRJNA1465574
CPE10266	Chuncheon	CCT	LTCF	Escherichia coli	NDM	SAMN59747754	PRJNA1465574
CPE10245	Gangneung	GNA	ACH	Klebsiella pneumoniae	KPC	SAMN59747743	PRJNA1465574
CPE10122	Chuncheon	CCH	ACH	Klebsiella pneumoniae	OXA-48 variant	SAMN59747755	PRJNA1465574
CPE10248	Gangneung	GNA	ACH	Klebsiella pneumoniae	KPC	SAMN59747745	PRJNA1465574
CPE10246	Gangneung	GNA	ACH	Klebsiella pneumoniae	KPC	SAMN59747744	PRJNA1465574
CPE10121	Chuncheon	CCH	ACH	Klebsiella michiganensis	KPC	SAMN59747756	PRJNA1465574
CPE10023	Wonju	WJC	ACH	Escherichia coli	OXA-48 variant	SAMN59747757	PRJNA1465574
CPE10270	Gangneung	DHN	LTCF	Klebsiella pneumoniae	OXA-48 variant	SAMN59747758	PRJNA1465574
CPE10271	Gangneung	DHN	LTCF	Klebsiella pneumoniae	KPC	SAMN59747759	PRJNA1465574
CPE10022	Wonju	WJC	ACH	Klebsiella pneumoniae	KPC	SAMN59747760	PRJNA1465574
CPE10267	Chuncheon	CCT	LTCF	Klebsiella pneumoniae	KPC	SAMN59747761	PRJNA1465574
CPE10123	Chuncheon	CCH	ACH	Klebsiella pneumoniae	KPC	SAMN59747762	PRJNA1465574
CPE10249	Gangneung	GNA	ACH	Klebsiella pneumoniae	KPC	SAMN59747746	PRJNA1465574
CPE10124	Chuncheon	CCH	ACH	Klebsiella pneumoniae	KPC, VIM	SAMN59747763	PRJNA1465574
CPE10125	Chuncheon	CCH	ACH	Klebsiella pneumoniae	KPC	SAMN59747764	PRJNA1465574
CPE10250	Gangneung	GNA	ACH	Klebsiella pneumoniae	KPC	SAMN59747747	PRJNA1465574
CPE10251	Gangneung	GNA	ACH	Klebsiella pneumoniae	KPC	SAMN59747748	PRJNA1465574
CPE10268	Gangneung	DHN	LTCF	Klebsiella pneumoniae	KPC	SAMN59747765	PRJNA1465574
CPE10269	Gangneung	DHN	LTCF	Klebsiella pneumoniae	KPC	SAMN59747766	PRJNA1465574
CPE10126	Chuncheon	CCH	ACH	Klebsiella pneumoniae	KPC	SAMN59747767	PRJNA1465574
CPE10272	Gangneung	DHN	LTCF	Klebsiella pneumoniae	KPC	SAMN59747768	PRJNA1465574
CPE10273	Chuncheon	CCN	LTCF	Shigella dysenteriae	KPC	SAMN59747769	PRJNA1465574
CPE10277	Chuncheon	CCT	LTCF	Escherichia coli	KPC	SAMN59747770	PRJNA1465574
CPE10024	Wonju	WJC	ACH	Klebsiella pneumoniae	KPC, OXA-48 variant	SAMN59747771	PRJNA1465574
CPE10275	Chuncheon	CCT	LTCF	Klebsiella pneumoniae	KPC	SAMN59747772	PRJNA1465574
CPE10279	Gangneung	DHN	LTCF	Klebsiella pneumoniae	KPC	SAMN59747773	PRJNA1465574
CPE10127	Chuncheon	CCH	ACH	Escherichia fergusonii	KPC	SAMN59747774	PRJNA1465574
CPE10274	Chuncheon	CCT	LTCF	Citrobacter portucalensis	NDM	SAMN59747775	PRJNA1465574
CPE10025	Wonju	WJC	ACH	Shigella flexneri	OXA-48 variant	SAMN59747776	PRJNA1465574
CPE10276	Chuncheon	CCT	LTCF	Klebsiella pneumoniae	KPC	SAMN59747777	PRJNA1465574
CPE10278	Chuncheon	CCT	LTCF	Klebsiella pneumoniae	KPC	SAMN59747778	PRJNA1465574
CPE10128	Chuncheon	CCH	ACH	Klebsiella pneumoniae	KPC	SAMN59747779	PRJNA1465574
CPE10282	Gangneung	DHN	LTCF	Klebsiella pneumoniae	KPC	SAMN59747780	PRJNA1465574
CPE10021	Wonju	WJC	ACH	Klebsiella pneumoniae	KPC	SAMN59747781	PRJNA1465574
CPE10283	Gangneung	DHN	LTCF	Klebsiella pneumoniae	KPC	SAMN59747782	PRJNA1465574
CPE10281	Chuncheon	CCN	LTCF	Klebsiella pneumoniae	KPC	SAMN59747783	PRJNA1465574
CPE10129	Chuncheon	CCH	ACH	Klebsiella pneumoniae	KPC	SAMN59747784	PRJNA1465574
CPE10284	Gangneung	DHN	LTCF	Klebsiella pneumoniae	KPC	SAMN59747785	PRJNA1465574
CPE10255	Gangneung	GNA	ACH	Klebsiella pneumoniae	KPC	SAMN59747786	PRJNA1465574
CPE10256	Gangneung	GNA	ACH	Klebsiella pneumoniae	KPC	SAMN59747787	PRJNA1465574
CPE10280	Chuncheon	CCT	LTCF	Klebsiella pneumoniae	KPC	SAMN59747788	PRJNA1465574
CPE10287	Chuncheon	CCT	LTCF	Klebsiella pneumoniae	KPC	SAMN59747789	PRJNA1465574
CPE10288	Chuncheon	CCT	LTCF	Klebsiella pneumoniae	KPC	SAMN59747790	PRJNA1465574
CPE10257	Gangneung	GNA	ACH	Shigella dysenteriae	KPC	SAMN59747791	PRJNA1465574
CPE10258	Gangneung	GNA	ACH	Klebsiella pneumoniae	KPC	SAMN59747792	PRJNA1465574
CPE10027	Wonju	WJC	ACH	Klebsiella pneumoniae	OXA-48 variant	SAMN59747793	PRJNA1465574
CPE10026	Wonju	WJC	ACH	Klebsiella pneumoniae	KPC	SAMN59747794	PRJNA1465574
CPE10130	Chuncheon	CCH	ACH	Klebsiella pneumoniae	KPC	SAMN59747795	PRJNA1465574
CPE10260	Gangneung	GNA	ACH	Klebsiella pneumoniae	KPC	SAMN59747796	PRJNA1465574
CPE10285	Gangneung	DHN	LTCF	Klebsiella pneumoniae	KPC	SAMN59747797	PRJNA1465574
CPE10261	Gangneung	GNA	ACH	Klebsiella pneumoniae	KPC	SAMN59747798	PRJNA1465574
CPE10259	Gangneung	GNA	ACH	Klebsiella pneumoniae	KPC	SAMN59747799	PRJNA1465574
CPE10262	Gangneung	GNA	ACH	Klebsiella pneumoniae	KPC	SAMN59747800	PRJNA1465574
CPE10286	Chuncheon	CCN	LTCF	Klebsiella pneumoniae	KPC	SAMN59747801	PRJNA1465574
CPE10132	Chuncheon	CCH	ACH	Klebsiella pneumoniae	KPC	SAMN59747802	PRJNA1465574
CPE10291	Chuncheon	CCN	LTCF	Klebsiella pneumoniae	KPC	SAMN59747803	PRJNA1465574
CPE10133	Chuncheon	CCH	ACH	Escherichia coli	KPC	SAMN59747804	PRJNA1465574
CPE10134	Chuncheon	CCH	ACH	Klebsiella michiganensis	KPC	SAMN59747805	PRJNA1465574
CPE10293	Gangneung	DHN	LTCF	Klebsiella pneumoniae	KPC	SAMN59747806	PRJNA1465574
CPE10263	Gangneung	GNA	ACH	Klebsiella pneumoniae	KPC	SAMN59747807	PRJNA1465574
CPE10292	Chuncheon	CCN	LTCF	Klebsiella pneumoniae	KPC	SAMN59747808	PRJNA1465574
CPE10131	Chuncheon	CCH	ACH	Klebsiella pneumoniae	NDM	SAMN59747809	PRJNA1465574
CPE10289	Chuncheon	CCT	LTCF	Klebsiella pneumoniae	KPC	SAMN59747810	PRJNA1465574
CPE10290	Chuncheon	CCT	LTCF	Klebsiella pneumoniae	KPC	SAMN59747811	PRJNA1465574
CPE10264	Gangneung	GNA	ACH	Klebsiella pneumoniae	KPC	SAMN59747812	PRJNA1465574
CPE10265	Gangneung	GNA	ACH	Klebsiella pneumoniae	OXA-48 variant	SAMN59747813	PRJNA1465574
CPE10294	Chuncheon	CCN	LTCF	Escherichia coli	OXA-48 variant	SAMN59747814	PRJNA1465574
CPE10295	Gangneung	DHN	LTCF	Klebsiella pneumoniae	KPC	SAMN59747815	PRJNA1465574
CPE10297	Gangneung	DHN	LTCF	Escherichia coli	KPC	SAMN59747816	PRJNA1465574
CPE10136	Chuncheon	CCH	ACH	Klebsiella pneumoniae	KPC	SAMN59747817	PRJNA1465574
CPE10135	Chuncheon	CCH	ACH	Klebsiella quasipneumoniae	IMP	SAMN59747818	PRJNA1465574
CPE10184	Gangneung	GNA	ACH	Klebsiella pneumoniae	KPC	SAMN59747819	PRJNA1465574
CPE10296	Wonju	YSM	LTCF	Klebsiella pneumoniae	OXA-48 variant	SAMN59747820	PRJNA1465574
CPE10185	Gangneung	GNA	ACH	Klebsiella pneumoniae	KPC	SAMN59747821	PRJNA1465574
CPE10298	Chuncheon	CCT	LTCF	Klebsiella pneumoniae	KPC	SAMN59747822	PRJNA1465574
CPE10186	Gangneung	GNA	ACH	Klebsiella pneumoniae	KPC	SAMN59747823	PRJNA1465574
CPE10029	Wonju	WJC	ACH	Escherichia coli	KPC	SAMN59747824	PRJNA1465574
CPE10137	Chuncheon	CCH	ACH	Klebsiella pneumoniae	KPC	SAMN59747825	PRJNA1465574
CPE10299	Chuncheon	CCT	LTCF	Klebsiella pneumoniae	KPC	SAMN59747826	PRJNA1465574
CPE10304	Chuncheon	CCN	LTCF	Klebsiella pneumoniae	OXA-48 variant	SAMN59747827	PRJNA1465574
CPE10138	Chuncheon	CCH	ACH	Klebsiella pneumoniae	KPC	SAMN59747828	PRJNA1465574
CPE10139	Chuncheon	CCH	ACH	Escherichia coli	KPC	SAMN59747829	PRJNA1465574
CPE10300	Chuncheon	CCT	LTCF	Klebsiella pneumoniae	KPC	SAMN59747830	PRJNA1465574
CPE10301	Wonju	YSM	LTCF	Citrobacter koseri	OXA-48 variant	SAMN59747831	PRJNA1465574
CPE10028	Wonju	WJC	ACH	Enterobacter cloacae	KPC	SAMN59747832	PRJNA1465574
CPE10302	Chuncheon	CCT	LTCF	Klebsiella pneumoniae	KPC	SAMN59747833	PRJNA1465574
CPE10303	Chuncheon	CCT	LTCF	Klebsiella pneumoniae	KPC	SAMN59747834	PRJNA1465574
CPE10187	Gangneung	GNA	ACH	Escherichia coli	KPC	SAMN59747835	PRJNA1465574
CPE10305	Gangneung	DHN	LTCF	Klebsiella pneumoniae	KPC	SAMN59747836	PRJNA1465574
CPE10140	Chuncheon	CCH	ACH	Klebsiella michiganensis	KPC	SAMN59747837	PRJNA1465574
CPE10141	Chuncheon	CCH	ACH	Klebsiella michiganensis	KPC	SAMN59747838	PRJNA1465574
CPE10142	Chuncheon	CCH	ACH	Klebsiella pneumoniae	KPC	SAMN59747839	PRJNA1465574
CPE10306	Gangneung	SCW	LTCF	Klebsiella pneumoniae	KPC	SAMN59747840	PRJNA1465574
CPE10311	Gangneung	DHN	LTCF	Klebsiella pneumoniae	KPC	SAMN59747841	PRJNA1465574
CPE10188	Gangneung	GNA	ACH	Klebsiella pneumoniae	KPC	SAMN59747842	PRJNA1465574
CPE10309	Chuncheon	CCT	LTCF	Klebsiella pneumoniae	KPC	SAMN59747843	PRJNA1465574
CPE10310	Chuncheon	CCT	LTCF	Escherichia coli	KPC	SAMN59747844	PRJNA1465574
CPE10312	Gangneung	DHN	LTCF	Klebsiella pneumoniae	KPC	SAMN59747845	PRJNA1465574
CPE10189	Gangneung	GNA	ACH	Escherichia coli	KPC	SAMN59747846	PRJNA1465574
CPE10190	Gangneung	GNA	ACH	Citrobacter portucalensis	KPC	SAMN59747847	PRJNA1465574
CPE10308	Chuncheon	CCT	LTCF	Escherichia coli	KPC	SAMN59747848	PRJNA1465574
CPE10143	Chuncheon	CCH	ACH	Klebsiella pneumoniae	KPC	SAMN59747849	PRJNA1465574
CPE10144	Chuncheon	CCH	ACH	Klebsiella oxytoca	KPC	SAMN59747850	PRJNA1465574
CPE10145	Chuncheon	CCH	ACH	Escherichia coli	KPC	SAMN59747851	PRJNA1465574
CPE10034	Wonju	WJC	ACH	Klebsiella pneumoniae	KPC, NDM	SAMN59747852	PRJNA1465574
CPE10146	Chuncheon	CCH	ACH	Klebsiella michiganensis	KPC	SAMN59747853	PRJNA1465574
CPE10030	Wonju	WJC	ACH	Escherichia coli	KPC	SAMN59747854	PRJNA1465574
CPE10031	Wonju	WJC	ACH	Klebsiella pneumoniae	KPC	SAMN59747855	PRJNA1465574
CPE10313	Gangneung	DHN	LTCF	Klebsiella pneumoniae	KPC	SAMN59747856	PRJNA1465574
CPE10307	Wonju	YSM	LTCF	Klebsiella grimontii	NDM	SAMN59747857	PRJNA1465574
CPE10314	Gangneung	DHN	LTCF	Klebsiella pneumoniae	KPC	SAMN59747858	PRJNA1465574
CPE10032	Wonju	WJC	ACH	Klebsiella pneumoniae	KPC	SAMN59747859	PRJNA1465574
CPE10315	Gangneung	SCW	LTCF	Klebsiella michiganensis	KPC	SAMN59747860	PRJNA1465574
CPE10149	Chuncheon	CCH	ACH	Enterobacter sp. CPE10149	KPC	SAMN59747861	PRJNA1465574
CPE10316	Gangneung	SCW	LTCF	Klebsiella pneumoniae	KPC	SAMN59747862	PRJNA1465574
CPE10147	Chuncheon	CCH	ACH	Klebsiella pneumoniae	OXA-48 variant	SAMN59747863	PRJNA1465574
CPE10148	Chuncheon	CCH	ACH	Escherichia coli	OXA-48 variant	SAMN59747864	PRJNA1465574
CPE10191	Gangneung	GNA	ACH	Escherichia coli	NDM	SAMN59747865	PRJNA1465574
CPE10192	Gangneung	GNA	ACH	Klebsiella pneumoniae	KPC	SAMN59747866	PRJNA1465574
CPE10318	Gangneung	DHN	LTCF	Klebsiella pneumoniae	KPC	SAMN59747867	PRJNA1465574
CPE10151	Chuncheon	CCH	ACH	Klebsiella pneumoniae	KPC	SAMN59747868	PRJNA1465574
CPE10033	Wonju	WJC	ACH	Escherichia coli	KPC	SAMN59747869	PRJNA1465574
CPE10150	Chuncheon	CCH	ACH	Klebsiella pneumoniae	KPC	SAMN59747870	PRJNA1465574
CPE10194	Gangneung	GNA	ACH	Escherichia coli	KPC	SAMN59747871	PRJNA1465574
CPE10038	Wonju	WJC	ACH	Escherichia coli	OXA-48 variant	SAMN59747872	PRJNA1465574
CPE10195	Gangneung	GNA	ACH	Klebsiella pneumoniae	KPC	SAMN59747873	PRJNA1465574
CPE10319	Gangneung	SCW	LTCF	Klebsiella pneumoniae	KPC	SAMN59747874	PRJNA1465574
CPE10193	Gangneung	GNA	ACH	Escherichia coli	OXA-48 variant	SAMN59747875	PRJNA1465574
CPE10317	Gangneung	DHN	LTCF	Klebsiella pneumoniae	KPC	SAMN59747876	PRJNA1465574
CPE10039	Wonju	WJC	ACH	Escherichia coli	KPC	SAMN59747877	PRJNA1465574
CPE10040	Wonju	WJC	ACH	Klebsiella pneumoniae	KPC	SAMN59747878	PRJNA1465574
CPE10196	Gangneung	GNA	ACH	Escherichia coli	OXA-48 variant	SAMN59747879	PRJNA1465574
CPE10320	Gangneung	DHN	LTCF	Klebsiella pneumoniae	KPC	SAMN59747880	PRJNA1465574
CPE10321	Gangneung	DHN	LTCF	Escherichia coli	KPC	SAMN59747881	PRJNA1465574
CPE10322	Gangneung	DHN	LTCF	Escherichia coli	KPC	SAMN59747882	PRJNA1465574
CPE10323	Gangneung	DHN	LTCF	Escherichia coli	KPC	SAMN59747883	PRJNA1465574
CPE10197	Gangneung	GNA	ACH	Klebsiella pneumoniae	KPC	SAMN59747884	PRJNA1465574
CPE10199	Gangneung	GNA	ACH	Citrobacter freundii	NDM	SAMN59747885	PRJNA1465574
CPE10200	Gangneung	GNA	ACH	Citrobacter freundii	NDM	SAMN59747886	PRJNA1465574
CPE10035	Wonju	WJC	ACH	Klebsiella pneumoniae	OXA-48 variant	SAMN59747887	PRJNA1465574
CPE10324	Gangneung	SCW	LTCF	Klebsiella pneumoniae	KPC	SAMN59747888	PRJNA1465574
CPE10203	Gangneung	GNA	ACH	Klebsiella michiganensis	KPC	SAMN59747889	PRJNA1465574
CPE10325	Gangneung	SCW	LTCF	Klebsiella michiganensis	KPC	SAMN59747890	PRJNA1465574
CPE10198	Gangneung	GNA	ACH	Klebsiella pneumoniae	KPC	SAMN59747891	PRJNA1465574
CPE10202	Gangneung	GNA	ACH	Klebsiella michiganensis	KPC	SAMN59747892	PRJNA1465574
CPE10036	Wonju	WJC	ACH	Klebsiella pneumoniae	OXA-48 variant	SAMN59747893	PRJNA1465574
CPE10201	Gangneung	GNA	ACH	Klebsiella pneumoniae	KPC	SAMN59747894	PRJNA1465574
CPE10326	Gangneung	DHN	LTCF	Klebsiella pneumoniae	KPC	SAMN59747895	PRJNA1465574
CPE10037	Wonju	WJC	ACH	Klebsiella pneumoniae	KPC	SAMN59747896	PRJNA1465574
CPE10152	Chuncheon	CCH	ACH	Klebsiella pneumoniae	KPC	SAMN59747897	PRJNA1465574
CPE10328	Gangneung	SCW	LTCF	Klebsiella pneumoniae	OXA-48 variant	SAMN59747898	PRJNA1465574
CPE10327	Gangneung	DHN	LTCF	Klebsiella pneumoniae	KPC	SAMN59747899	PRJNA1465574
CPE10205	Gangneung	GNA	ACH	Escherichia coli	NDM	SAMN59747900	PRJNA1465574
CPE10206	Gangneung	GNA	ACH	Escherichia coli	KPC	SAMN59747901	PRJNA1465574
CPE10204	Gangneung	GNA	ACH	Escherichia coli	NDM	SAMN59747902	PRJNA1465574
CPE10207	Gangneung	GNA	ACH	Klebsiella pneumoniae	KPC	SAMN59747903	PRJNA1465574
CPE10208	Gangneung	GNA	ACH	Klebsiella planticola	NDM	SAMN59747904	PRJNA1465574
CPE10153	Chuncheon	CCH	ACH	Klebsiella pneumoniae	KPC	SAMN59747905	PRJNA1465574
CPE10209	Gangneung	GNA	ACH	Escherichia coli	KPC	SAMN59747906	PRJNA1465574
CPE10041	Wonju	WJC	ACH	Klebsiella pneumoniae	OXA-48 variant	SAMN59747907	PRJNA1465574
CPE10042	Wonju	WJC	ACH	Escherichia coli	OXA-48 variant	SAMN59747908	PRJNA1465574
CPE10043	Wonju	WJC	ACH	Klebsiella oxytoca	KPC	SAMN59747909	PRJNA1465574
CPE10044	Wonju	WJC	ACH	Klebsiella pneumoniae	KPC	SAMN59747910	PRJNA1465574
CPE10045	Wonju	WJC	ACH	Klebsiella pneumoniae	KPC	SAMN59747911	PRJNA1465574
CPE10046	Wonju	WJC	ACH	Escherichia coli	NDM	SAMN59747912	PRJNA1465574
CPE10047	Wonju	WJC	ACH	Klebsiella pneumoniae	KPC	SAMN59747913	PRJNA1465574
CPE10048	Wonju	WJC	ACH	Klebsiella quasipneumoniae	NDM	SAMN59747914	PRJNA1465574
CPE10049	Wonju	WJC	ACH	Klebsiella pneumoniae	KPC	SAMN59747915	PRJNA1465574
CPE10050	Wonju	WJC	ACH	Escherichia coli	NDM, OXA-48 variant	SAMN59747916	PRJNA1465574
CPE10051	Wonju	WJC	ACH	Shigella flexneri	OXA-48 variant	SAMN59747917	PRJNA1465574
CPE10210	Gangneung	GNA	ACH	Klebsiella pneumoniae	KPC	SAMN59747918	PRJNA1465574
CPE10211	Gangneung	GNA	ACH	Escherichia coli	KPC	SAMN59747919	PRJNA1465574
CPE10212	Gangneung	GNA	ACH	Klebsiella michiganensis	KPC	SAMN59747920	PRJNA1465574
CPE10213	Gangneung	GNA	ACH	Escherichia coli	KPC	SAMN59747921	PRJNA1465574
CPE10154	Chuncheon	CCH	ACH	Escherichia coli	KPC	SAMN59747922	PRJNA1465574
CPE10156	Chuncheon	CCH	ACH	Klebsiella pneumoniae	KPC	SAMN59747923	PRJNA1465574
CPE10157	Chuncheon	CCH	ACH	Klebsiella pneumoniae	OXA-48 variant	SAMN59747924	PRJNA1465574
CPE10158	Chuncheon	CCH	ACH	Klebsiella pneumoniae	KPC	SAMN59747925	PRJNA1465574
CPE10214	Gangneung	GNA	ACH	Klebsiella pneumoniae	KPC	SAMN59747926	PRJNA1465574
CPE10215	Gangneung	GNA	ACH	Klebsiella michiganensis	KPC	SAMN59747927	PRJNA1465574
CPE10216	Gangneung	GNA	ACH	Escherichia coli	KPC	SAMN59747928	PRJNA1465574
CPE10155	Chuncheon	CCH	ACH	Klebsiella pneumoniae	KPC	SAMN59747929	PRJNA1465574
CPE10159	Chuncheon	CCH	ACH	Klebsiella michiganensis	KPC	SAMN59747930	PRJNA1465574
CPE10160	Chuncheon	CCH	ACH	Klebsiella pneumoniae	KPC	SAMN59747931	PRJNA1465574
CPE10217	Gangneung	GNA	ACH	Shigella flexneri	KPC	SAMN59747932	PRJNA1465574
CPE10161	Chuncheon	CCH	ACH	Enterobacter kobei	NDM	SAMN59747933	PRJNA1465574
CPE10162	Chuncheon	CCH	ACH	Klebsiella pneumoniae	KPC	SAMN59747934	PRJNA1465574
CPE10163	Chuncheon	CCH	ACH	Klebsiella pneumoniae	KPC	SAMN59747935	PRJNA1465574
CPE10164	Chuncheon	CCH	ACH	Klebsiella pneumoniae	KPC	SAMN59747936	PRJNA1465574
CPE10218	Gangneung	GNA	ACH	Klebsiella pneumoniae	KPC	SAMN59747937	PRJNA1465574
Note: Organism indicates genome-based species assignment. Facility type was classified as acute-care hospital (ACH) or long-term care facility (LTCF). Carbapenemase family indicates the detected carbapenemase enzyme family. BioSample and BioProject accession numbers refer to NCBI accession identifiers. CCH, Hallym University Chuncheon Sacred Heart Hospital; CCN, Chuncheon Nursing Hospital; CCT, T…
